# Supplementary material
Source: PubMed Central journal article supplement (PMC6693834)
Supplement: jciinsight-4-130273-s146.pdf [file jciinsight-4-130273-s146.pdf]

# FigS1

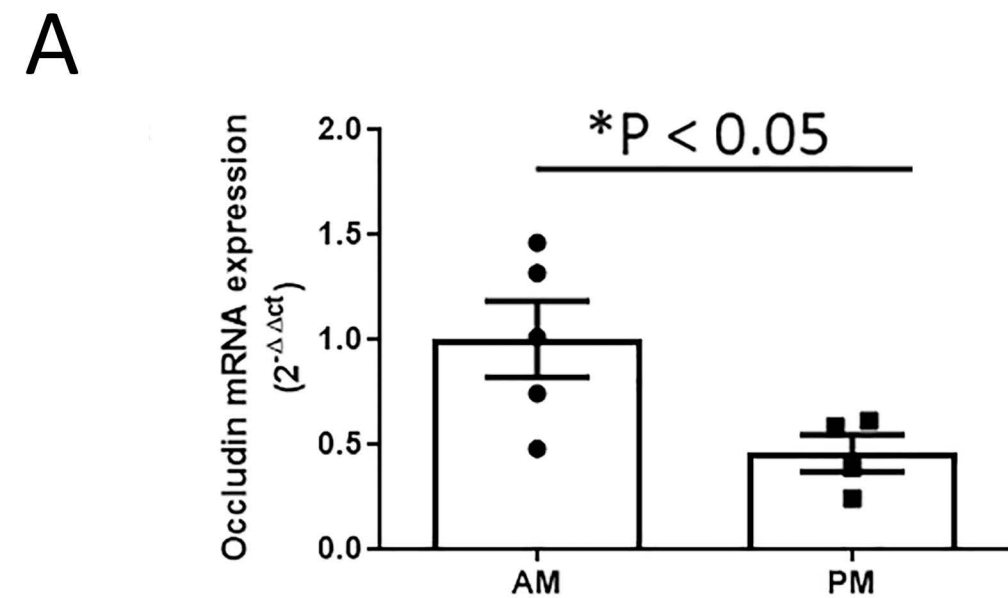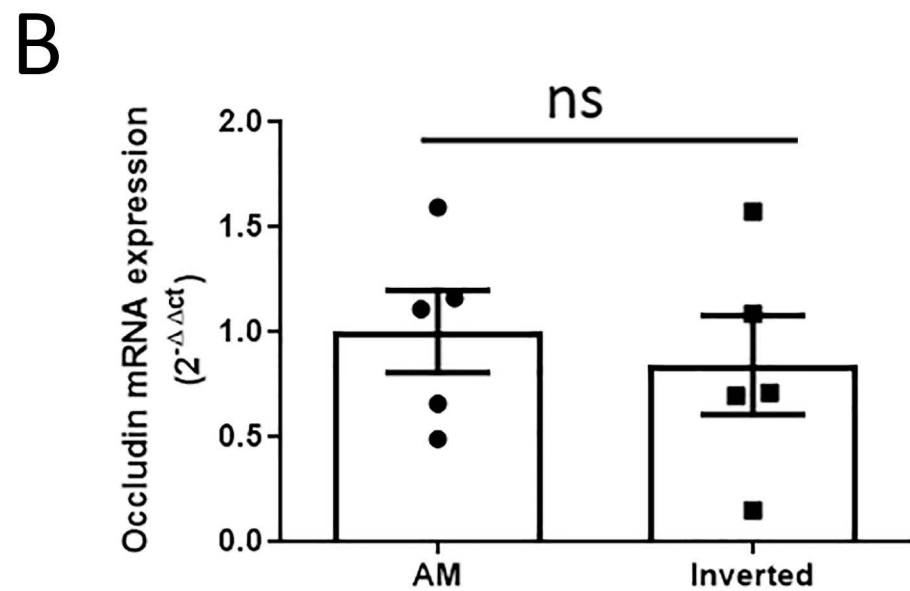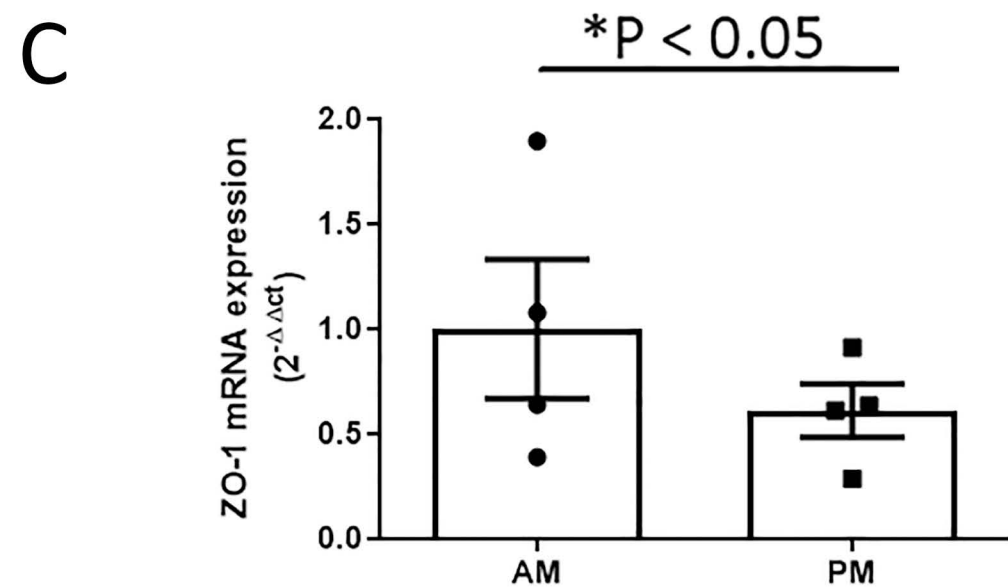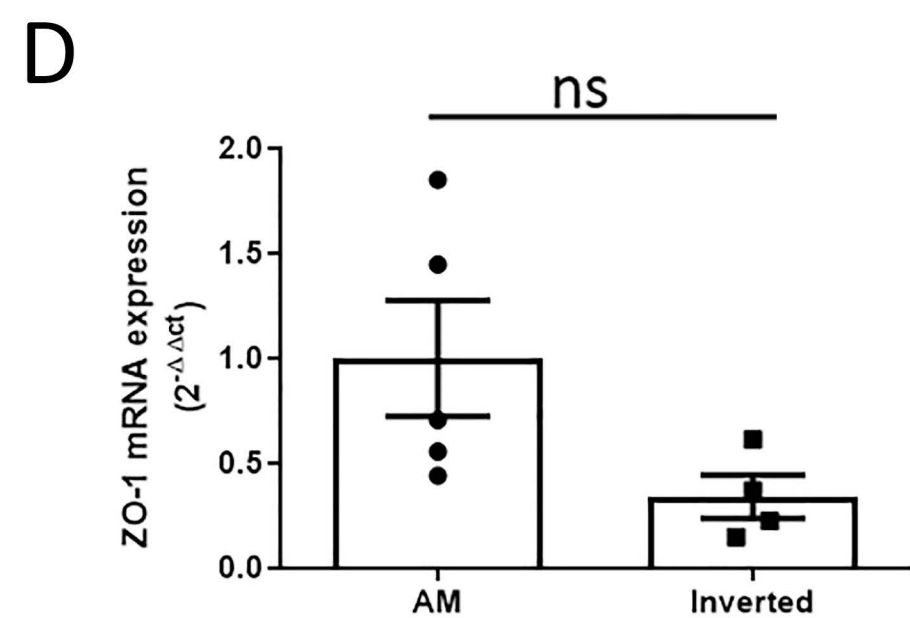

# FigS2

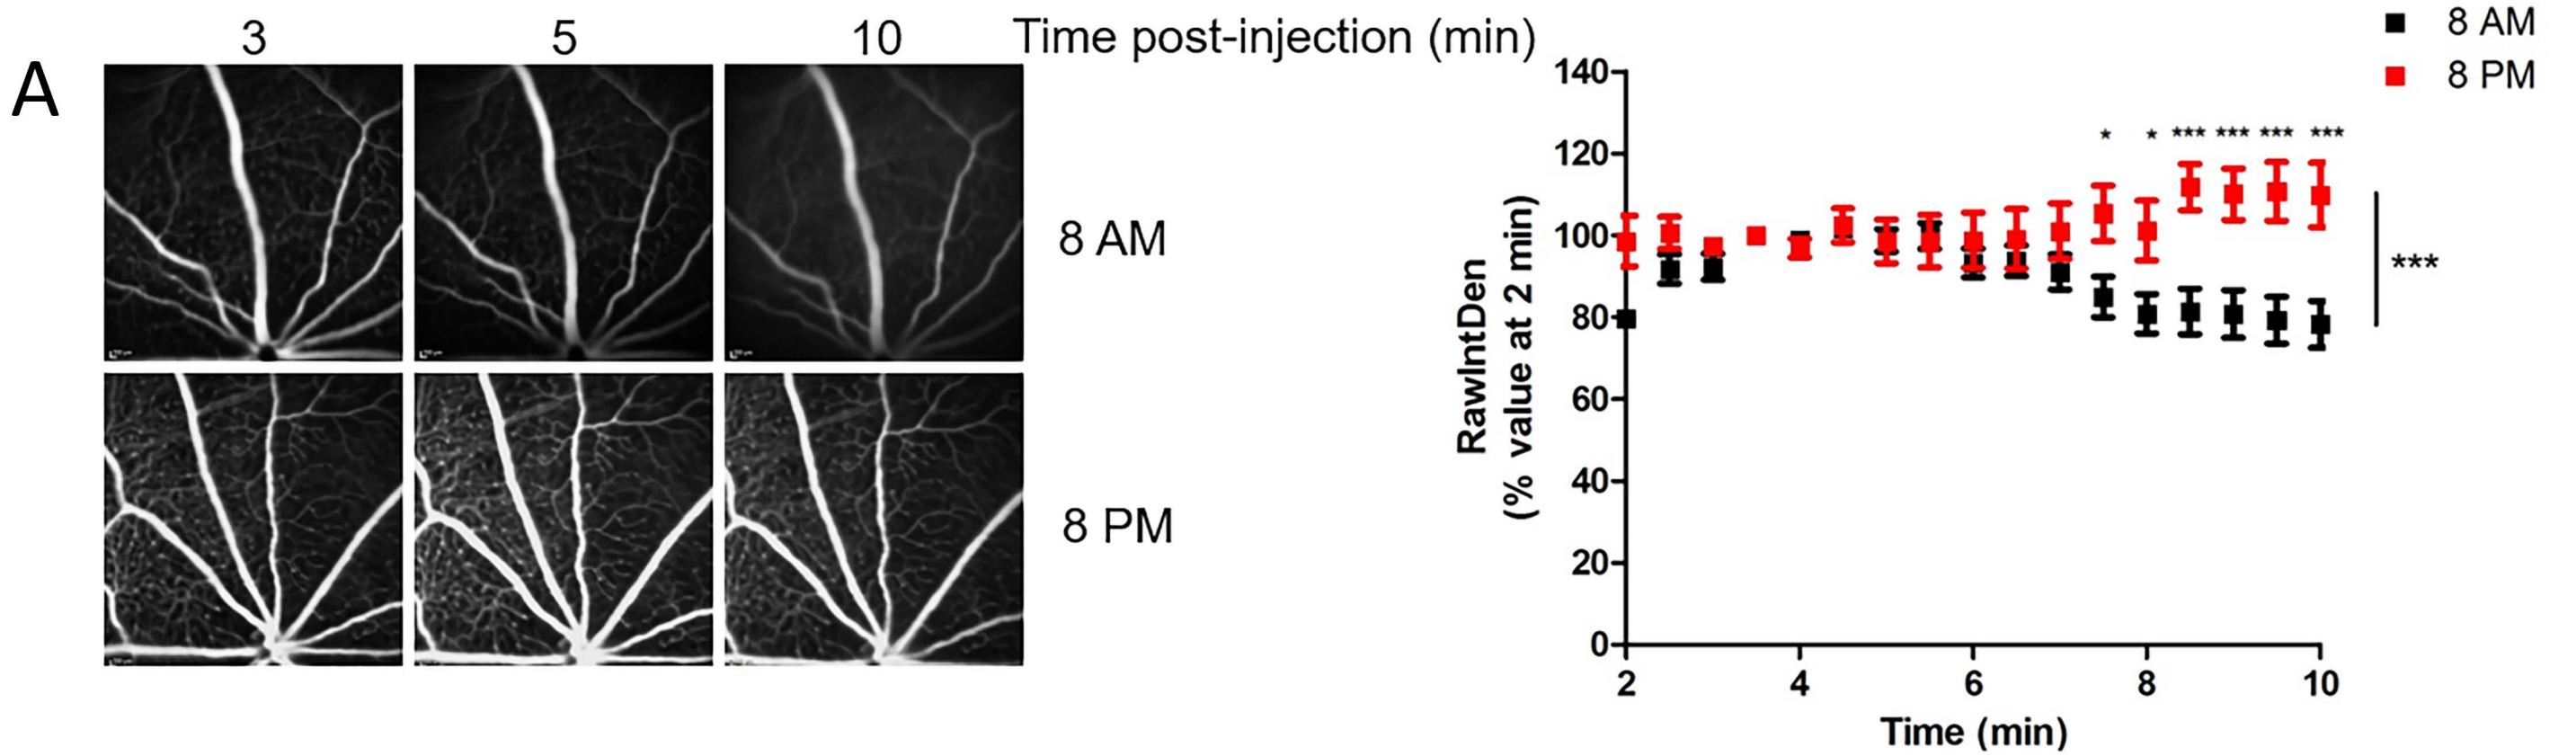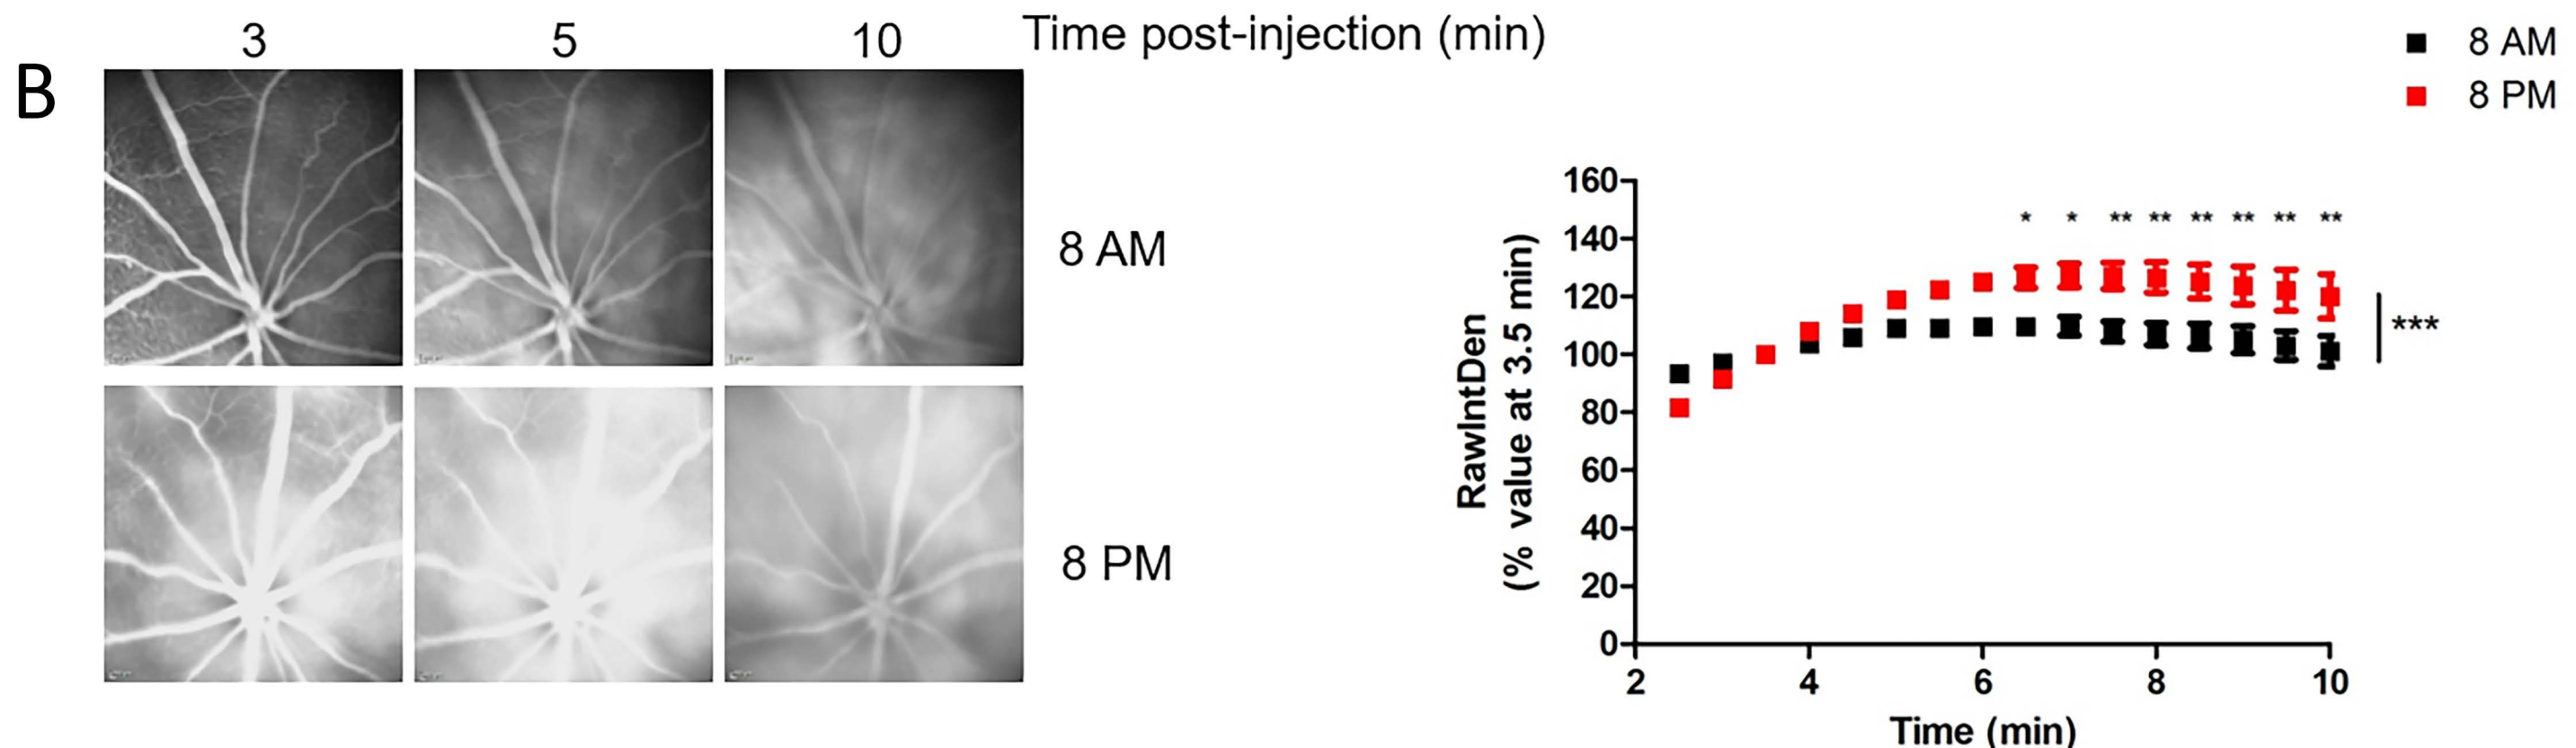

FigS3 3

5

10

Time post-injection (min)

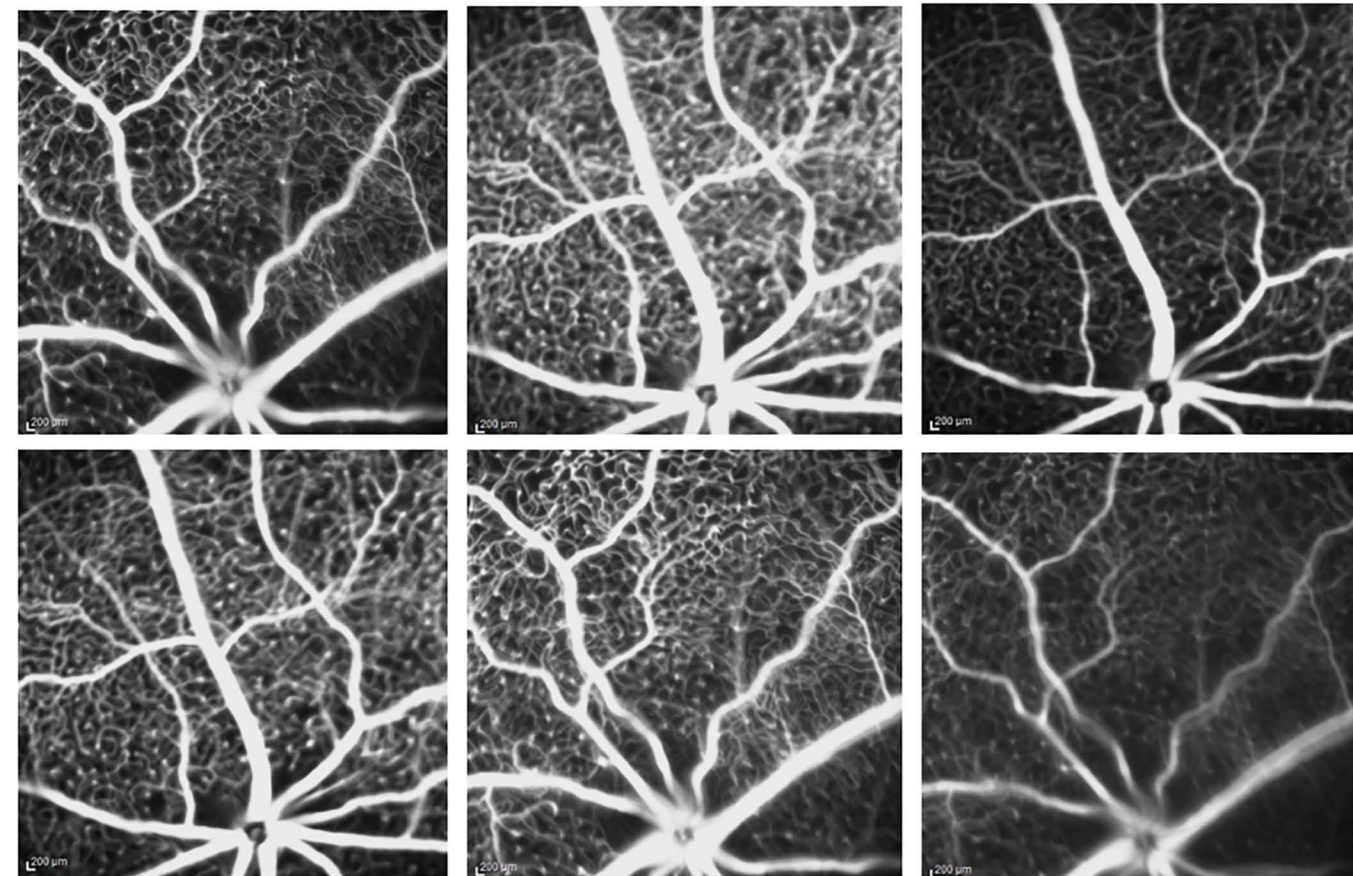

8 AM

8 PM

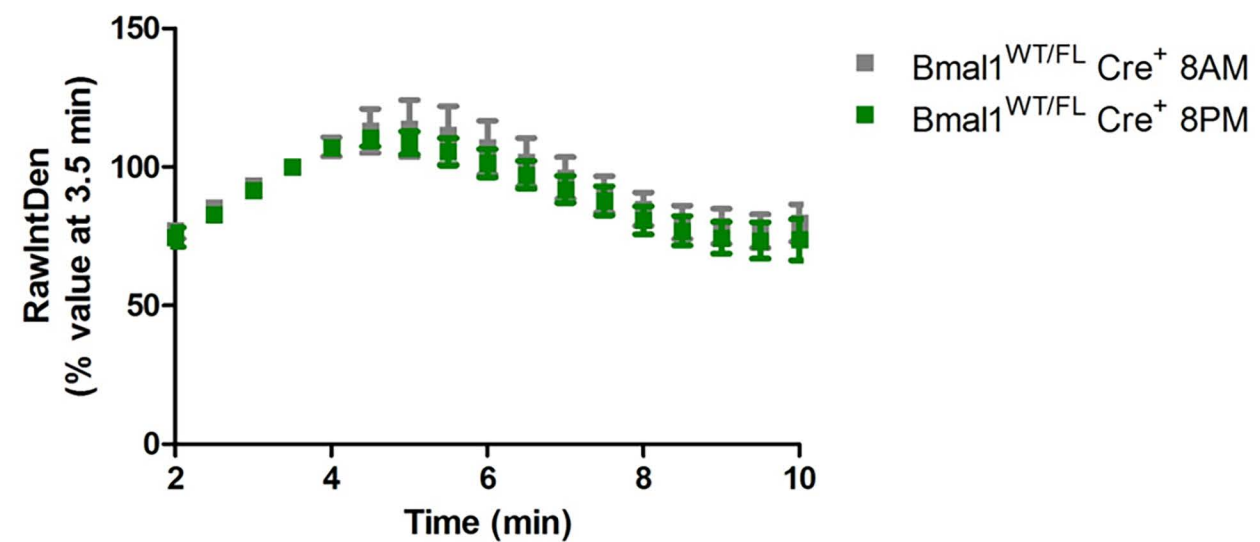

| Male n=11 |           |          | Female n=4 |           |            |
|-----------|-----------|----------|------------|-----------|------------|
|           | Mean      | Std Dev  |            | Mean      | std dev    |
| Age       | 24.909    | 3.015113 | Age        | 26.500    | 2.51661148 |
| Height    | 181.000   | 6.557439 | Height     | 158.000   | 6.92820323 |
| Weight    | 83.000    | 17.49286 | Weight     | 57.250    | 6.94622199 |
| Race      | Caucasian | All      | Race       | Caucasian | 3 of 4     |
|           |           |          |            | Asian     | 1 of 4     |

The basis for estimating chronotype is the Mid-Sleep Time on Free days (MSF)  $MSF = SO_f + (SD_f)/2$ ; MSF is then corrected for "oversleep" on free days that subjects use to compensate the sleep debt accumulated during the workweek:  $MSF_{sc} = MSF - (SD_f - SD_{week})/2$ ;

NOTE: These are in decimal time such that 10:30 is listed as 10.5

| MSFsc    | PM time pre MSFsc | AM time post MSFsc |
|----------|-------------------|--------------------|
| 5.202    | 9.602             | 2.464              |
| 4.981    | 9.148             | 2.986              |
| 7.071    | 10.971            | 1.262              |
| 4.575    | 9.191             | 2.959              |
| 5.488    | 10.155            | 2.428              |
| 4.036    | 9.036             | 3.248              |
| 6.658    | 10.925            | 0.625              |
| 5.095    | 9.445             | 2.305              |
| 6.018    | 10.618            | 1.649              |
| 5.625    | 9.642             | 1.892              |
| 4.493    | 9.060             | 3.257              |
| 3.286    | 7.502             | 4.081              |
| 4.786    | 9.419             | 2.831              |
| 3.927    | 8.927             | 3.806              |
| 7.667    | 12.550            | 0.000              |
| Average: |                   |                    |
| 5.261    | 9.746             | 2.386              |
| STD Dev  |                   |                    |
| 1.206    | 1.173             | 1.138              |
